1 **Activity budget and gut microbiota across reproductive states in wild, female capuchin**  
2 **monkeys in a seasonal dry forest**

3

4 Shasta E. Webb<sup>1\*</sup>, Joseph D. Orkin<sup>2,3</sup>, Rachel E. Williamson<sup>1</sup>, Amanda D. Melin<sup>1,4\*</sup>

5

6 \*Authors for correspondence

7

8 1 Department of Anthropology and Archaeology, University of Calgary, Calgary, Canada

9 2 Institut de Biologia Evolutiva, Universitat Pompeu Fabra-CSIC, Barcelona, Spain

10 3 Département d'anthropologie, Université de Montréal, Montréal, Canada

11 4 Department of Medical Genetics, Cumming School of Medicine, University of Calgary,  
12 Calgary, Canada

13

14 **ABSTRACT**

15

16 Energy demands associated with pregnancy and lactation are significant forces in mammalian  
17 evolution. To mitigate increased energy costs associated with reproduction, female mammals  
18 have evolved behavioral and physiological responses. Some species alter activity to conserve  
19 energy during pregnancy and lactation, while others experience changes in metabolism and fat  
20 deposition. Restructuring of gut microbiota with shifting reproductive states may also help  
21 females increase energy harvest from foods, especially during pregnancy. Here, we combine life  
22 history data with >13,000 behavioral scans and >300 fecal samples collected longitudinally  
23 across multiple years from 33 white-faced capuchin monkey females to examine the  
24 relationships among behavior, gut microbiota composition, and reproductive state. We used 16S-  
25 based amplicon sequencing and the DADA2 pipeline to analyze microbial diversity and putative  
26 functions. Reproductive state explained some variation in activity, but overall resting and  
27 foraging behaviours were relatively stable across the reproductive cycle. We found evidence for  
28 increases in biotin synthesis pathways among microbes in lactating females, and that microbial  
29 community dissimilarity among the states was small but significant. Otherwise, gut microbiota  
30 structure and estimated functions were not substantially different among reproductive states.

31 These data contribute to a broader understanding of plasticity in response to physiological shifts  
32 associated with mammalian reproduction.

33

## 34 **INTRODUCTION**

35 The demands of pregnancy and lactation have been an influential force throughout mammalian  
36 evolution. Female mammals experience discrete stages of the reproductive cycle, including  
37 cycling, pregnancy, and lactation, but variation across mammalian taxa exists in response to  
38 cycling parameters, litter size, birth weight, gestation length, weaning age, weaning mass, and  
39 interbirth interval (Gittleman & Thompson, 1988). Lactation is typically the most energetically  
40 demanding stage of the reproductive cycle because milk production and other aspects of infant  
41 care, including infant carrying, require considerable energy above basal metabolic function  
42 (Clutton-Brock et al., 1989; Dewey, 1997; Gittleman & Thompson, 1988). Pregnancy is the  
43 second most energetically-demanding state, and non-pregnant, non-lactation states (i.e. cycling  
44 and non-cycling pauses) are the least energetically costly (Dufour & Sauter, 2002; Serio-Silva  
45 et al., 1999). In addition to heightened net energy demands, pregnancy and lactation also  
46 introduce increased protein and other nutrient requirements to fuel fetal and infant growth  
47 (Dewey, 1997; National Research Council, 2003). Energy requirements typically increase as a  
48 fetus develops during pregnancy; after parturition, energy demands continue to increase as the  
49 mother produces milk (Ellison, 2003; Emery Thompson, 2013; Villar et al., 1992). As the infant  
50 grows and needs more milk combined with larger infant size, energy demand on the mother  
51 continues to grow. During the final stages of lactation, once the infant becomes semi-  
52 independent in the lead-up to weaning, energy requirements related to infant care decrease  
53 (Figure 1).

54

55

56

57

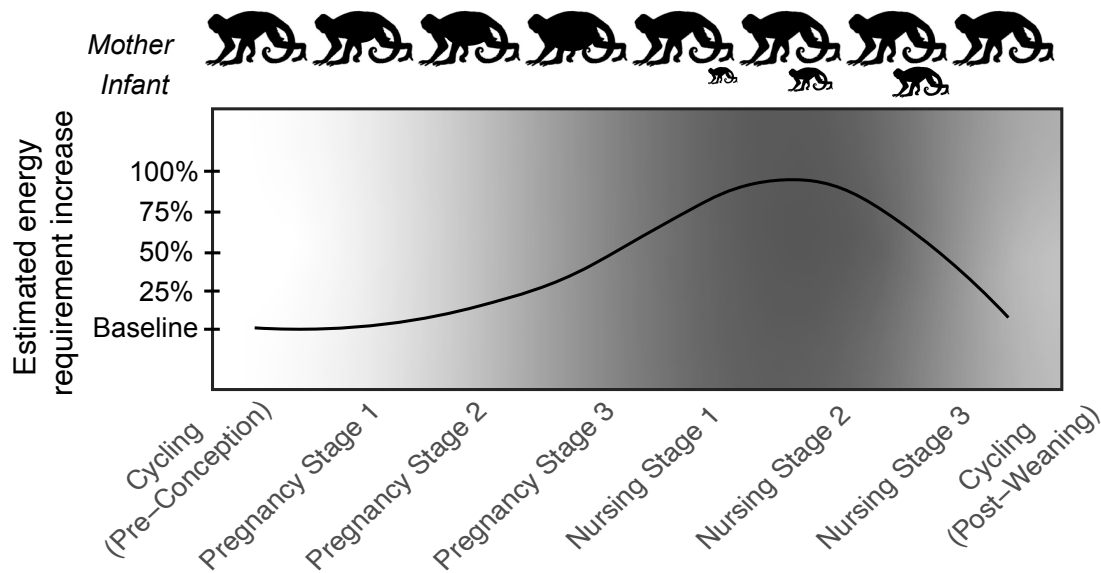

58

59 **Figure 1.** Visualization of estimated increases in energy requirements during the reproductive  
60 cycle of a non-human primate. Female primates face a 25% increase in daily energy  
61 requirements during gestation, and up to a 50-100% increase during lactation (Key & Ross,  
62 1999).

63 Mammals vary widely in the length and energy costs of reproduction and have evolved multiple  
64 strategies in response. Adaptations include behavioral responses to seasonal fluctuations in food  
65 availability. For example, harbour seals (*Phoca vitulina*) and other migratory species travel to  
66 specific breeding sites and feeding sites, and exhibit strictly seasonal breeding that is tied to food  
67 abundance in their environment (Bowen et al., 2001). For mammals that are not constrained by  
68 migratory patterns or strict seasonal breeding, behavioral flexibility—including modulating  
69 energy expenditure, foraging rates, and food choice—offers a strategy to mitigate increased  
70 energy costs of pregnancy and lactation. Primates, including humans, exemplify these behavioral  
71 strategies. While some primates conserve energy during costly reproductive stages by resting for  
72 larger proportions of the day (e.g. red-ruffed lemurs [*Varecia rubra*], (Vasey, 2005); green  
73 monkeys [*Cercopithecus sabaesus*] (Harrison, 1983)), others increase energy intake, either by  
74 foraging for longer periods of the day (e.g. yellow baboons (*Papio cynocephalus*) (Altmann,

75 2001)) or by increasing their intake rate of foods (e.g. white-faced capuchins [*Cebus capucinus*  
76 *imitator*] (McCabe & Fedigan, 2007)).

77 Adaptations to the demands of the reproductive cycle also include physiological changes that  
78 occur within the mother. For example, changing patterns of fat gain enable females to  
79 accumulate fat stores during pregnancy that they can draw from during lactation. Humans  
80 typically experience increased fat deposition during pregnancy, even in cases when they are  
81 experiencing food stress (Poppitt et al., 1993). Similar results were found in a study of captive  
82 bonobos (*Pan paniscus*), in which pregnant females did not lose weight while experiencing  
83 caloric restriction (Deschner et al., 2008). Sufficient temporary fat gain during pregnancy  
84 supports efficient and healthy development of infants. Too little fat gain may lead to increased  
85 periods of lactation and increased interbirth interval (e.g. humans (Lunn et al., 1984)), while too  
86 much fat gain during gestation can lead to birth complications (e.g. domestic canines and felines  
87 (Fontaine, 2012)).

88 Research on humans suggests that pregnancy is also associated with changes in gut microbial  
89 communities (DiGiulio et al., 2015; Koren et al., 2012; Smid et al., 2018). These changes, which  
90 include reduced diversity of microbes, shifts in prominent bacterial phyla associated with energy  
91 harvest, and shifts in putative metabolic pathways related to energy absorption are linked to  
92 metabolic disease states in non-pregnant individuals. However, in the context of reproductive  
93 demands, they may serve an adaptive role in increasing energy harvest from food during times of  
94 increased energy need for fetal development and allow for increased fat storage to cope with  
95 costs of lactation (Edwards et al., 2017; Koren et al., 2012). In non-human mammals, evidence  
96 suggests gut microbiota change during reproduction (e.g. Tibetan macaques (Sun et al., 2021)),  
97 and shifts may be hormonally mediated (Mallott et al., 2020). However, other researchers have  
98 found that composition and predicted function of individuals' gut microbiota remained relatively  
99 static throughout pregnancy and into early lactation (Jost et al., 2013). These contrasting findings  
100 may be due to differences in study design, methods, and sample species and population.  
101 Alternatively, they may indicate that the degree to which the gut microbiome can shift during  
102 pregnancy is constrained or enabled by external factors.

103 Behavioral and gut microbial changes might interact to address the demands of pregnancy and  
104 lactation. However, few studies have combined behavioral and gut microbial data tracked  
105 throughout pregnancy and lactation to understand the nuances of how mammals in a wild setting  
106 cope with increased energy requirements. Here, we combine behavioral and gut microbial data  
107 from a well-studied population of wild non-human primates to examine the strategy or  
108 combination of strategies that female primates employ to address the increased energetic costs of  
109 pregnancy and lactation. To examine behavioral and gut microbial community flexibility as they  
110 relate to the reproductive cycle, we studied a population of omnivorous, wild white-faced  
111 capuchin monkeys that exhibit moderately seasonal breeding. Specifically, we examine white-  
112 faced capuchin monkey responses to changing reproductive stages over the course of 5 years in a  
113 seasonal dry forest. We combine a robust data set of >13000 behavioral scans with >300 fecal  
114 samples collected from 33 monkeys to study behavioral and gut microbial responses to  
115 reproduction in a species that inhabits a dynamic and seasonal ecosystem. Our first aim was to  
116 compare activity budgets of white-faced capuchins among and within cycling, pregnancy, and  
117 nursing stages. We predict that if capuchins employ an “energy conservation” approach during  
118 pregnancy and nursing, then females will rest more in stages of higher energy demand compared  
119 to stages of lower energy demand. Conversely, if capuchins employ an “energy maximization”  
120 approach during pregnancy and lactation, then females will forage for larger proportions of their  
121 day compared to cycling capuchins. Our second aim was to investigate gut microbial changes in  
122 female capuchins among cycling, pregnant, and nursing states. We predict that gut microbiota  
123 will exhibit characteristics associated with increased capacity for energy harvest during periods  
124 of highest energy demand during pregnancy. We also predict that females’ gut microbiota will  
125 exhibit an increase in relative abundance of putative metabolic pathways related to energy  
126 metabolism and carbohydrate transport during pregnancy. Given the demonstrated potential for  
127 ecological and social factors to influence behavioral or gut microbial flexibility in this species,  
128 we additionally examine the potential effects of precipitation, temperature, diet, fruit biomass in  
129 the environment, and dominance rank on activity budget and gut microbial communities.

130  
131  
132

133 **RESULTS**

134

135 ***Aim 1: Compare activity budgets of white-faced capuchins among and within cycling,***  
136 ***pregnancy, and nursing stages***

137

138 To visualize overall activity budget shifts across the reproductive cycle, we combined related  
139 behaviors (see Ethogram, Supplemental Table 1) into six general categories: Foraging, Resting,  
140 Social Affiliation, Social Aggression, Travel, and Other. We calculated proportions of each  
141 category per total scans per day (Figure 2).

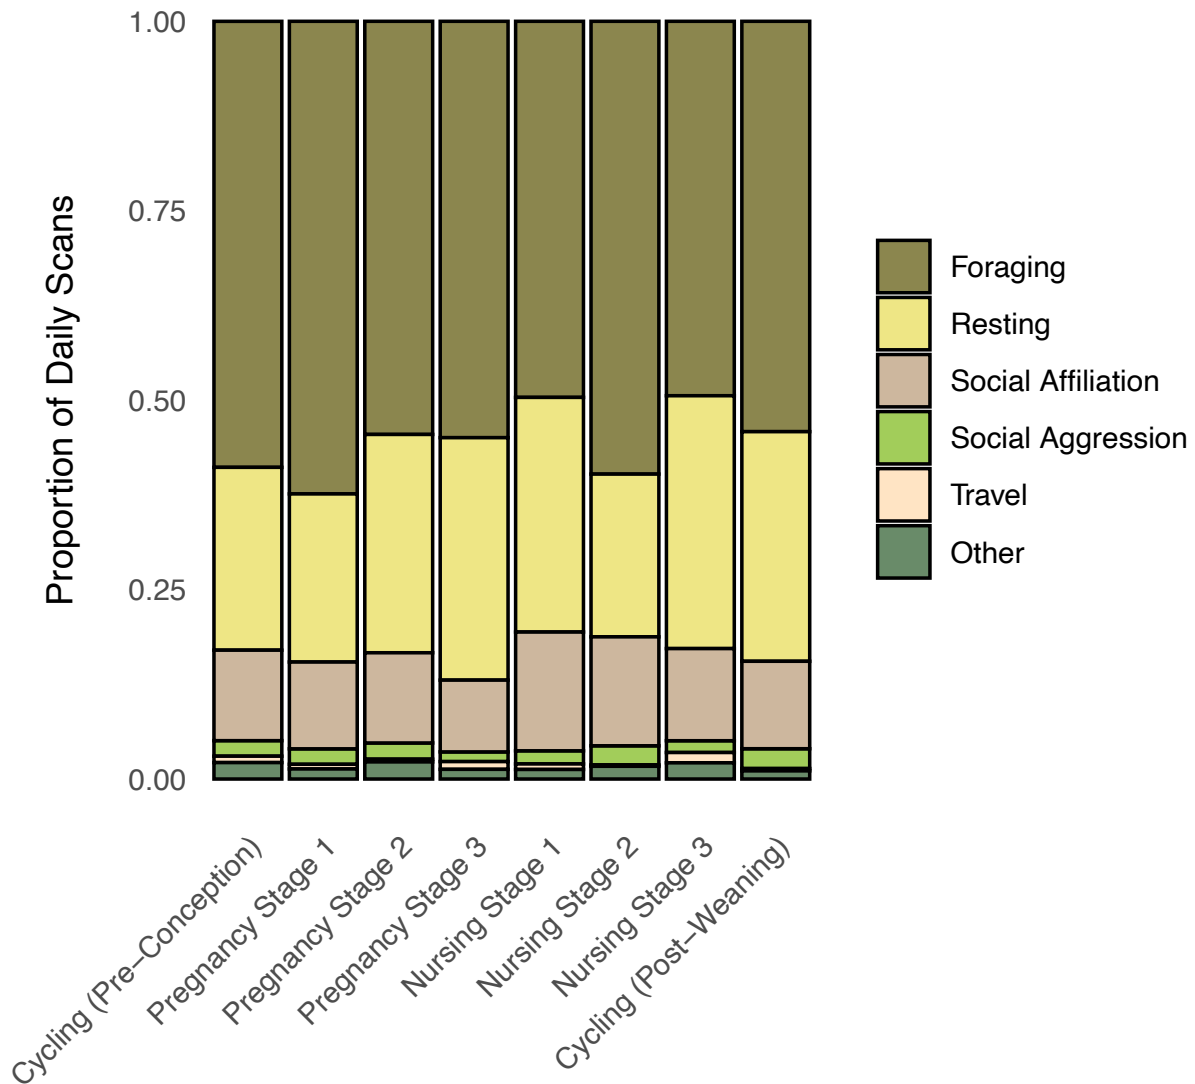

142 **Figure 2.** Proportions of daily scans spent in each of six behavioral categories across the  
 143 reproductive cycle. These data represent raw counts of scans per behavior per day divided by  
 144 total scans recorded per day.

145  
 146 *Resting activity within and among reproductive states*

147 A generalized linear mixed model of resting activity that included reproductive state  
 148 outperformed a null model excluding this variable, suggesting some variation in resting behavior  
 149 was explained by reproductive stage. High social rank was significantly negatively related to  
 150 total resting scans (Estimate = -0.13, SE = 0.06, Z-Value = -2.16, p = 0.03), indicating that  
 151 higher ranking individuals rested less often than lower or mid-ranking individuals. Maximum  
 152 temperature was significantly positively related to total resting scans indicating that monkeys  
 153 rested more often in hot temperatures (Estimate = 0.22, SE = 0.02, Z-Value = 10.35, p < 0.001)  
 154 (Supplemental Table 2). Incident Rate Ratios for all predictors are presented in Figure 3a and  
 155 values reported in Supplemental Table 2. Predicted counts of resting scans per day are visualized  
 156 in Figure 3b and demonstrate that resting increased throughout pregnancy and early nursing,  
 157 dipped in mid-nursing, and increased again in late nursing. However, variation was minor and  
 158 we did not find significant pairwise differences among the eight individual reproductive stages.

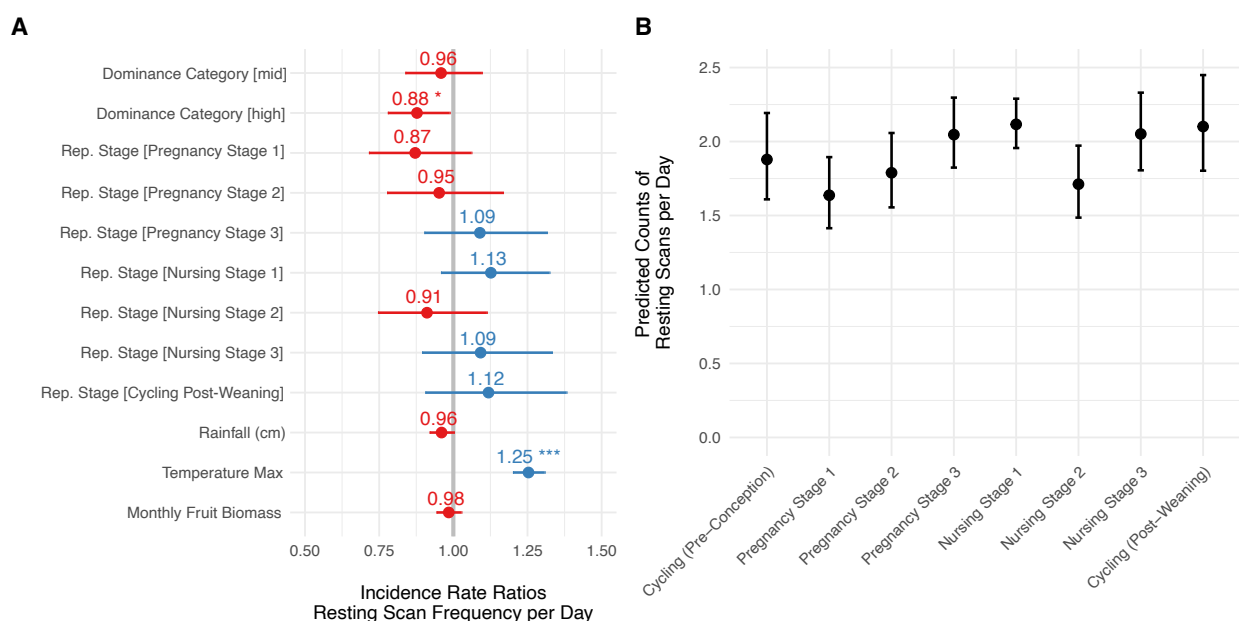

159

160 **Figure 3.** Incidence rate ratios (IRR) and standard error (**A**) for predictors from a GLMM of  
161 resting scans per day. The reference dominance category is low social rank; the reference  
162 reproductive stage is cycling (pre-conception). The grey vertical line represents “no effect”.  
163 Values to the right of the grey line represent positive effects and values to the left represent  
164 negative effects. Significant predictors ( $p < 0.05$ ) are denoted with asterisks. We present an  
165 alternative way to visualise the effect of reproductive stage on resting activity by plotting the  
166 predicted number of resting scans per day for each level of reproductive stage variable (**B**).

167 *Foraging activity within and among reproductive states*

168  
169 The generalized linear mixed model of foraging activity that included reproductive state  
170 outperformed a null model excluding this variable. Females in Nursing Stage 1 exhibited  
171 significantly fewer foraging scans per day compared to other stages (Estimate = -0.13, SE = 0.05,  
172 Z-Value = -2.45,  $p = 0.01$ ). Ecological variables including rainfall, daily maximum temperature,  
173 and estimates fruit biomass were also significantly correlated with foraging scans per day and  
174 values are reported in Supplemental Table 2). Incident Rate Ratios for all predictors in the model  
175 are presented in Figure 4a and we visualized predicted counts of foraging scans per day in Figure  
176 4b. These predicted counts, which take into account all other predictors in the foraging model,  
177 suggest that foraging scans steadily decreased throughout pregnancy and into early nursing  
178 before increasing throughout late nursing and into post-weaning cycling.

179



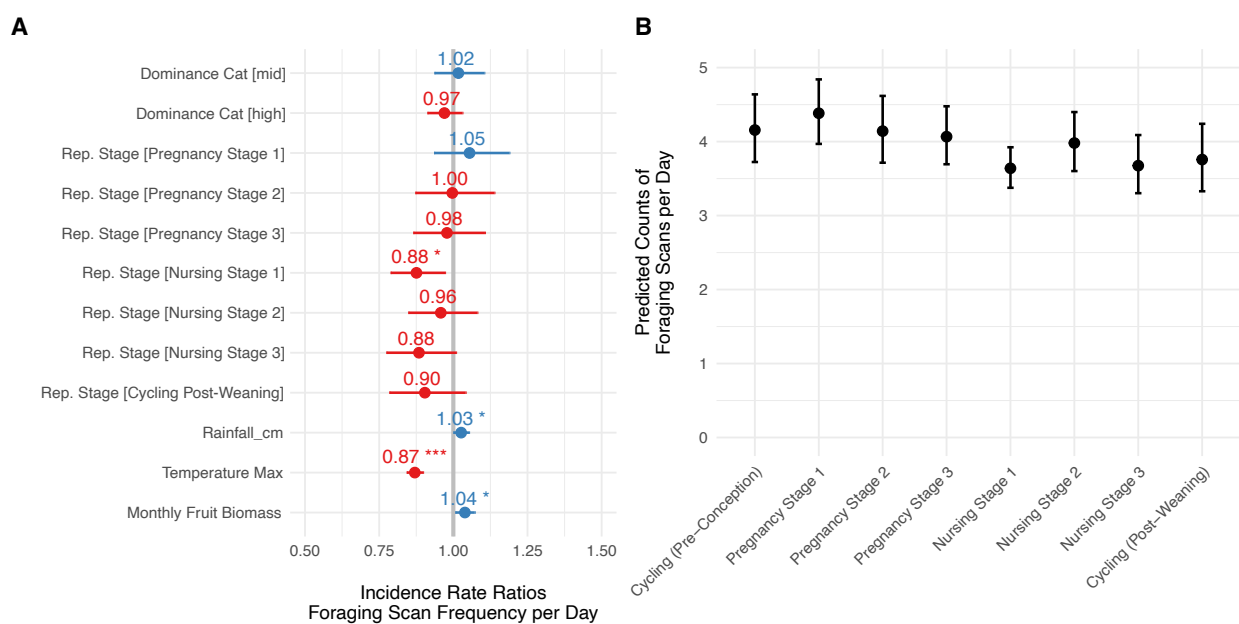

180

181 **Figure 4.** Incidence rate ratios (IRR) and standard error (**A**) for predictors from GLMM of  
 182 foraging scans per day. The reference dominance category is low social rank; the reference  
 183 reproductive stage is cycling (pre-conception). The grey vertical line represents “no effect”.  
 184 Values to the right of the grey line represent positive effects and values to the left represent  
 185 negative effects. Significant predictors ( $p < 0.05$ ) are denoted with asterisks. We present an  
 186 alternative way to visualise the effect of reproductive stage on foraging activity by plotting the  
 187 predicted number of resting scans per day for each level of reproductive stage variable (**B**).  
 188

188

189 ***Aim II: Investigate gut microbial changes in female capuchins among cycling, pregnant,***  
 190 ***and nursing states***

191

192 *Gut microbial community structure remained consistent among reproductive states*

193

194 Overall, when we examined broad metrics of gut microbial community structure, we found that  
 195 reproductive state was not a significant predictor of the Chao1 species richness or Shannon alpha  
 196 diversity (Supplemental Table 3). Rainfall was significantly negatively correlated with Chao1  
 197 richness (Incidence Rate Ratio = 0.89, CI = 0.83 – 0.95,  $p = 0.001$ ), but no other predictors were  
 198 significant in either model. Reproductive status was not a significant predictor of gut microbial  
 199 community dissimilarity (DF= 2,  $F = 1.275$ ,  $R^2 = 0.008$ ,  $P = 0.163$ ) and samples from the same

200 reproductive state did not cluster distinctly (Figure 5). Individual identity accounted for a  
201 statistically significant degree of dissimilarity among samples (DF = 28, F = 1.278, R<sup>2</sup> = 0.11, P  
202 = 0.003), as did diet type and rainfall (Supplemental Table 3).  
203

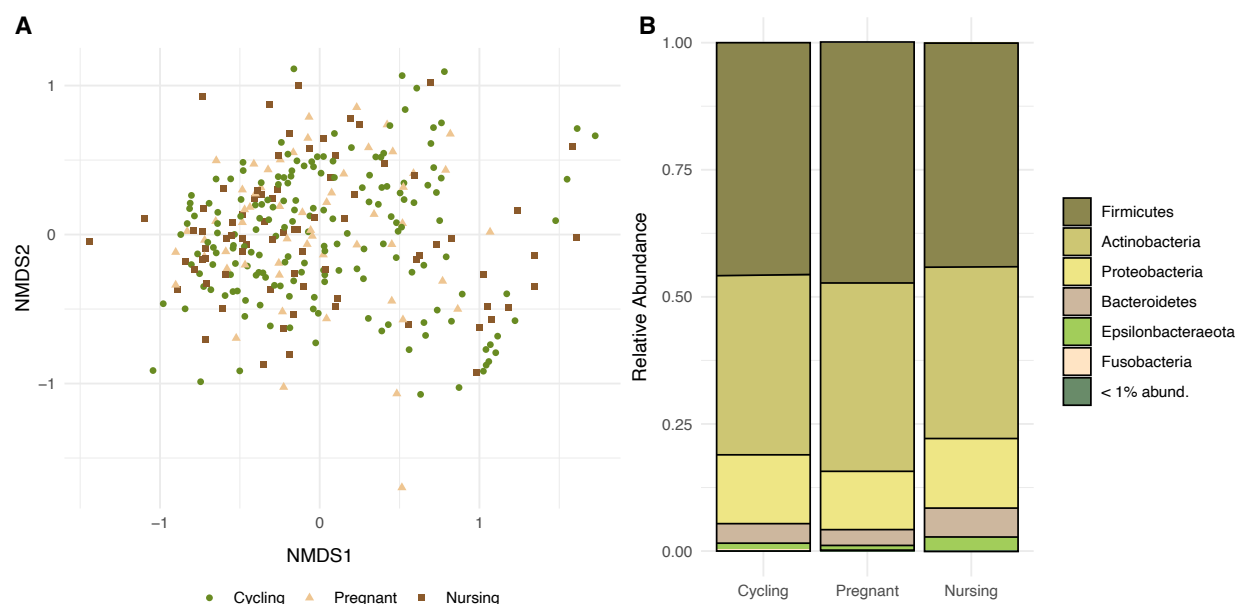

204  
205 **Figure 5.** For each sample, Bray-Curtis dissimilarity values were computed and ordinated using  
206 non-metric multidimensional scaling (NMDS). Samples did not cluster according to reproductive  
207 status which was also not a significant predictor of dissimilarity among fecal microbial  
208 communities. Relative abundance of phyla were visualized across reproductive statuses. Phyla  
209 with relative abundances below 0.01 were grouped in the category “<1% abund.” Relative  
210 abundances remained generally stable across the reproductive states.

211  
212 To investigate other structural changes in the fecal microbial communities among reproductive  
213 states, we visualized the relative abundance of phyla across the reproductive cycle, grouping all  
214 phyla with relative abundances lower than 1% (Figure 5b). We found that pregnant females  
215 exhibited a small but significant increase in Firmicutes taxa compared to cycling females (log<sub>2</sub>  
216 fold change = 0.493, SE = 0.146, P = 0.008). Cycling females exhibited a small but significant  
217 increase in the phylum Epsilonbacteraeota (log<sub>2</sub> fold change = 1.149, SE = 0.293, P < 0.001).  
218 We also examined whether specific genera were differentially abundant among the reproductive  
219 states and found that cycling females exhibited a significant increase in taxa from the genus  
220 *Helicobacter* compared to nursing females (log<sub>2</sub> fold change = 1.226, SE = 0.309, P = 0.01).

221 *Estimated metabolic pathways remain largely stable among reproductive states*

222

223 Reproductive status was a significant predictor of estimated metabolic pathway dissimilarity, but  
224 the effect was small (PERMANOVA;  $df=2$ , F Value = 2.5075,  $R^2 = 0.017$ ,  $p < 0.001$ ). Nursing  
225 females were characterized by a significant increase in pathways related to biotin metabolism  
226 (Linear Discriminant Analysis; LDA Score = 3.176,  $p = 0.006$ ), but otherwise metabolic  
227 pathways did not differ substantially between reproductive statuses.

228

## 229 **DISCUSSION**

230

231 We analyzed a robust set of >13,000 individual scans to explore behavioral responses to  
232 reproduction and 308 fecal samples to understand gut microbial community dynamics in  
233 population of reproductively mature female capuchin monkeys. Our main findings are 1)  
234 reproductive state explains some variation in activity budget; in particular, foraging decreases  
235 significantly in early nursing compared to cycling, though resting and foraging activity remain  
236 otherwise stable across the reproductive cycle; 2) reproductive state explains some variation in  
237 gut microbial dissimilarity and relative abundance of putative metabolic pathways; 3) ecological  
238 and social variables including maximum temperature, social dominance, and estimated fruit  
239 biomass, as well as individual identity are related to activity and the gut microbiota more  
240 strongly than reproductive status.

241

242 *Activity budgets remain largely consistent within and among reproductive states*

243

244 In our first aim we sought to compare activity budgets of white-faced capuchins among and  
245 within cycling, pregnancy, and nursing states at a fine scale. Resting behavior was largely  
246 consistent across the reproductive cycle, but the variation observed suggests that resting  
247 increases slightly during pregnancy. This pattern fits well with expectations from available data  
248 on energy expenditure. While no single stage in the reproductive cycle was statically  
249 significantly different from the other stages in terms of resting, we observed a general pattern  
250 that suggests resting increases during pregnancy. Foraging behavior decreased steadily during  
251 pregnancy, possibly in connection to resting increases.

252  
253 During nursing, resting behavior peaked in early nursing, before decreasing in mid-nursing, and  
254 rebounding in late nursing. Foraging behavior decreased steadily into early nursing, where it was  
255 significantly lower in early nursing compared to other stages. We recognize that proportion of  
256 scans per day spent in foraging states is an imperfect estimator for amount of food consumed.  
257 Nevertheless, the statistically significant drop in foraging behavior during early nursing may  
258 have energy balance implications for females. Capuchins may alter behavior in other ways to  
259 cope with changing energy needs. For example, past research on a small subset of the current  
260 study population suggests that lactating females increase feeding rate (McCabe & Fedigan,  
261 2007), though we unfortunately lack the required depth of focal data to test this hypothesis in the  
262 current data set. There might also be underlying metabolic or other physiological changes such  
263 as metabolic shifts associated with energy sparing that we were not able to capture in the present  
264 study that help pregnant and lactating females address energy costs. Even though our sample size  
265 of 33 females tracked over multiple years and pregnancies is one of the largest available for wild  
266 primates, the pattern we observed in the resting behavior may be too subtle to reach significance  
267 with present sample sizes.

268  
269 While capuchins are generally considered highly flexible and plastic in response to changes in  
270 their environments (Fragaszy et al., 2004), it is likely that both resting and foraging behavior is  
271 relatively constrained in this population and are influenced by social and environmental factors,  
272 limiting the potential for flexibility in this domain in response to reproductive state. When food  
273 and water resources change drastically from season to season, capuchins alter their foraging and  
274 ranging behaviors to overlap with available food and water (Campos & Fedigan, 2009). We also  
275 see changes in thermoregulatory behaviors; capuchins rest more during the hottest parts of the  
276 day in the hotter season of the year, and exhibit seasonal behaviors likely linked to  
277 thermoregulation and water consumption. It is also possible that female capuchins are  
278 constrained in altering activity budget due to the pressures associated with group living. White-  
279 faced capuchins form cohesive groups, with the exception of emigrant males dispersing to non-  
280 natal groups. Females remain the same social group their entire lives (with the rare exception of  
281 group fissioning events), and capuchins forage, rest, and travel in close proximity to one another.  
282 Pregnant and lactating females may theoretically benefit from resting for longer periods of the

283 day or foraging for longer periods in a particularly productive food patch; however, if a pregnant  
284 or lactating female acts independently of the larger social group, she may be increasing risk of  
285 predation or encounters with other social groups. The ability of females to significantly alter  
286 resting or foraging may be constrained by the behavioral choices in the rest of the social group.  
287 Future studies examining these constraints on activity budget shifts represent an exciting future  
288 avenue of behavioral research.

289

290 *Gut microbial communities remain largely stable structurally and functionally throughout*  
291 *reproduction*

292

293 We found mixed support for the prediction that females modulate the gut microbiome to increase  
294 energy absorption from food during pregnancy and nursing. We did not observe statistically  
295 significant changes in alpha diversity in pregnant females, which contrast previous studies in  
296 humans that showed a drastic decrease in alpha diversity (Koren et al., 2012). Females in  
297 cycling, pregnant, and nursing states clustered separately in a beta diversity plot, but the effect  
298 was very small, suggesting alternative drivers of community dissimilarity, including individual  
299 variation. Overall, female capuchins did not exhibit large gut microbial structural shifts, but we  
300 did find that pregnant females exhibited small but significant increases in Firmicutes taxa. At a  
301 broad scale, taxa within Firmicutes break down carbohydrates that endogenous host enzymes are  
302 unable to metabolize. The ratio of Firmicutes to Bacteroidetes has previously been suggested as a  
303 biomarker for increased metabolic activity in the gut (Turnbaugh et al., 2006); however,  
304 contrasting reports of this ratio suggest it might not serve as a universal biomarker for increased  
305 energy (Magne et al., 2020). Further, the lack of substantial change in relative abundance among  
306 bacterial genera in our samples suggest that, in this population, reproductive state is not a critical  
307 driver of gut microbial community composition, at least at a broad scale.

308

309 Though gut microbial communities remained largely stable, nursing capuchins in our population  
310 exhibited a significant increase in a biotin metabolism pathway in the gut. Endogenous enzymes  
311 as well as gut microbes can metabolize biotin, which is involved in a broad range of metabolic  
312 processes related to fat-, carbohydrate-, and amino acid-utilization in mammals. Biotin  
313 deficiency and biotin excess during the reproductive has been linked to tetratogenic effects in

314 pregnancy in mice and humans (Báez-Saldaña et al., 2009). Studies of humans have repeatedly  
315 demonstrated that lactation and pregnancy alter biomarkers of biotin metabolism, and that  
316 humans are typically deficient in biotin during pregnancy, though precise requirements of biotin  
317 remain unknown (Mock et al., 2002; Perry et al., 2014). If non-human primates also require  
318 increased biotin during gestation and lactation, our results suggest that the gut microbiome may  
319 play an important role in helping nursing females increase biotin supplementation during fetal  
320 growth and infant development.

321  
322 Previous studies of non-human primates tend to suggest that the gut microbiome shifts  
323 considerably throughout the reproductive cycle (Amato et al., 2014; Mallott et al., 2020; Mallott  
324 & Amato, 2018). In a recent examination of white-faced capuchin reproductive microbial  
325 ecology, Mallott and Amato (2018) examined how gut microbial communities changed across  
326 reproductive states in females ( $n_{\text{females}} = 5$ ,  $n_{\text{samples}} = 39$ ) sampled across one year in an  
327 aseasonally breeding population of white-faced capuchins. The authors found evidence to  
328 suggest that the gut microbiome shifts significantly during the reproductive cycle, including  
329 differences in relative abundance of Firmicutes (lower in pregnant versus cycling females) and  
330 Actinobacteria (higher in pregnant versus lactating females). Further, the authors found that  
331 reproductive state was significantly associated with energy and glycan metabolism (Mallott &  
332 Amato, 2018). However, this capuchin population lives in a wet aseasonal forest, with little  
333 variation in food and water availability throughout the annual cycle (Mallott et al., 2018). The  
334 biome where our present study took place is, by contrast, highly seasonal, with distinct shifts in  
335 temperature, water availability and fruit and arthropod abundance (Campos et al., 2015;  
336 Mosdossy et al., 2015). In the hot, dry season animals contend with harsh drought and high  
337 temperature, while in the rainier, cooler season, these forces are less present. We have observed  
338 strong effects of seasonality on ranging behavior, activity budget, food choice, and the gut  
339 microbiota in this population (Campos et al., 2014; Campos & Fedigan, 2009; Melin et al., 2020;  
340 Orkin et al., 2019; Orkin et al., 2019). Extreme seasonality at the present study site and  
341 aseasonality at a different site that is home to the same species of capuchins may have critical  
342 implications for our understanding of how flexible and plastic this species is across its home  
343 range.

344

345 Capuchins are generally thought of as one of the most flexible and generalist species of  
346 platyrrhine primates that can thrive in a wide variety of habitats and that can consume a vast  
347 diversity of food types (Fragaszy et al., 2004; Melin et al., 2020). However, the reality might be  
348 a bit more nuanced. Steig Johnson and Kerry Brown (2018) examined niche breadth in  
349 Mesoamerican primates using an ecological niche modeling approach, and found that capuchins  
350 were considerably constrained by several ecological factors, including precipitation in particular  
351 seasons, and seasonality of temperatures. The temperatures and water availability at our study site  
352 near the limit of suitable conditions for this species, which may explain the lack of flexibility that  
353 we see in behavior and gut microbiota in this population. Understanding how flexibility shifts  
354 across a species range and identifying what ecological factors permit or constrain a species'  
355 ability to be flexible, is critical to understand not only that species' history, but also how it might  
356 fare as ecosystems face anthropogenic and climate-related changes.

357

358 Alternatively, we may be missing the importance of individual variation in response to  
359 reproductive states. For example, humans residing in the same population display remarkable  
360 differences in response to reproductive demands across our global range; for example, women in  
361 the Gambia and Sweden experience high within-group variation in weight gain and energy  
362 expenditure throughout pregnancy (Poppitt et al., 1993, 1994) and high inter-individual gut  
363 microbiota among members of the same population has been found in humans (Healey et al.,  
364 2017; Zhu et al., 2015). We found that individual identity accounted for a significant amount of  
365 gut microbial community dissimilarity, which raises exciting questions about individual  
366 strategies for coping with reproduction. Further, while activity budgets and amplicon sequencing  
367 provide important, though relatively coarse, data about behavior and gut microbiota  
368 respectively, future research on this population of capuchin could incorporate individual focal  
369 data and/or shotgun metagenomic sequencing, both of which would provide a more detailed  
370 understanding of capuchin reproductive behavioral and microbial ecology.

371

372 How animals respond to the demands of reproduction has important consequences for the  
373 viability of offspring, and on a longer term scale, the fitness of a population or species. The  
374 intricacies of how animals are able to shift their behavior and how their gut microbial  
375 communities may respond to pregnancy and lactation represent a complex but critical area of

376 research. For populations living near the ecological limits of their species ranges, it is especially  
377 important to understand the extent to which plasticity in behavior and gut microbial communities  
378 might influence pregnancy outcomes and multi-generational fitness.

379

## 380 **MATERIALS AND METHODS**

381

### 382 *Field site & study population*

383

384 We collected samples and behavioral data at Sector Santa Rosa (SSR), located in the Área de  
385 Conservación Guanacaste (ACG), in Guanacaste, Costa Rica (10°53'01''N 85°46'30''W).  
386 Sector Santa Rosa is a mosaic of forest types, including tropical dry forest and small patches of  
387 older growth evergreen forest. The ACG experiences two distinct seasons: a hot, dry period from  
388 late November to mid-May and a cooler, rainy period for the remainder of the year, during which  
389 almost all of the annual rainfall (900 mm-2400 mm) occurs (Melin et al., 2020). Fruit abundance  
390 varies throughout the year and estimates of fruit biomass are calculated monthly (Campos et al.,  
391 2015; Orkin et al., 2019).

392

393 The study population of white-faced capuchin monkeys has been continuously monitored non-  
394 invasively since 1983. Female capuchins are philopatric and reach reproductive maturity by 6  
395 years of age. Births are moderately seasonal at Sector Santa Rosa, with 44% of births occurring  
396 between May and July each year (Carnegie et al., 2011). Gestation is 157 +/- 8 days and typical  
397 inter-birth intervals are 2.5 years (Melin et al., 2020). Lactation lasts for approximately 12  
398 months; in early lactation, infants are almost exclusively dependent on their mothers and are  
399 observed nursing frequently (Fragaszy et al., 2004). It should be noted that in other white-faced  
400 capuchin populations, the lactation phase can extend to 23 months (Melin et al., 2020). After the  
401 first three months of nursing, infants gradually learn to forage independently and incorporate  
402 non-milk foods into their diet. By 12 months of age, infants are rarely observed nursing or  
403 traveling dorsally on their mothers. Infant capuchins are occasionally observed nursing from  
404 adult females that are not their mothers (Sargeant et al., 2016).

405



406 We collected data across 5 years (2014-2018). Non-invasive fecal samples were collected from  
407 33 adult females from 4 social groups during multiple sampling bouts in 2014-2016. We  
408 collected behavioral data from 33 adult females from 4 social groups during multiple sampling  
409 bouts in 2016-2018. One female from the 2014-2016 fecal sampling periods disappeared from  
410 the population and was not included in behavioral analysis but was included in gut microbiome  
411 analysis. Two females reached sexual maturity during the 2016-2018 period and were included  
412 in behavioral analysis but not in gut microbiome analysis. All animals in the study population are  
413 habituated to researcher presence and individually identifiable through physical markings on the  
414 face and body. In our dataset, 2016 was the only year in which we collected behavioral records  
415 and fecal samples simultaneously. Ideally, we would have behavioral records and fecal samples  
416 for all 5 years, but this was not possible due to field and laboratory limitations. However, the  
417 nearly all individuals (31/33) were present across the entire study period and each dataset  
418 (behavioral and fecal) is robust and overlapping.

419  
420 During bi-monthly censuses at the field site, reproductive state of each female is recorded.  
421 Pregnancies during the study period were determined via protrusion of the abdomen (visible  
422 approximately 8 weeks after conception), and after infant were born we estimated conception  
423 dates using 157 days as gestation length. At 15 time points throughout the 5-year study, females  
424 exhibited protruding abdomens consistent with pregnancy, but then were later observed with flat  
425 abdomens. We characterised these instances as pregnancy Isos, though we do not have hormonal  
426 data to confirm these pregnancies, which is a limitation associated with this assumption. We  
427 determined nursing on an *ad libitum* basis through observations of young monkeys suckling from  
428 adult females. Following Bergstrom (2015), we considered females nursing their own infants  
429 <12 months of age to be lactating. Juvenile capuchins are occasionally observed suckling after  
430 12 months of age, but it is difficult to determine whether milk is transferred. We did not consider  
431 cases in which juveniles >12 months were suckling to be indicative of lactation in the adult  
432 females from whom they were attempting to nurse. We considered females that were never  
433 observed as nursing or pregnant on data collection days as non-pregnant, non-nursing. We  
434 grouped all non-pregnant, non-nursing females into the category “cycling” following Bergstrom  
435 (Bergstrom, 2015).

436

437 Studies of humans and non-human primates suggest that energy requirements change throughout  
 438 pregnancy and lactation (Emery Thompson, 2013). To examine differences that occur *within*  
 439 each reproductive state, we subset the reproductive states into stages: Cycling (Pre-conception),  
 440 Pregnancy Stage 1 (early), Pregnancy Stage 2 (mid), Pregnancy Stage 3 (late), Nursing Stage 1  
 441 (early), Nursing Stage 2 (mid), Nursing Stage 3 (late), and Cycling (Post-weaning) (Table 1).

442

443 **Table 1.** Pregnancy and nursing were divided into three equal stages. Cycling (Pre-conception)  
 444 consisted of 60 days prior to a conceptive event, and Cycling (Post-weaning) consisted of 60  
 445 days post-weaning.

446

| Reproductive State       | Stage | Length                       |
|--------------------------|-------|------------------------------|
| Cycling (Pre-conception) | --    | 60-0 days before conception  |
| Pregnancy                | early | 0-53 days post conception    |
|                          | mid   | 54-104 days post conception  |
|                          | late  | 105-158 days post conception |
| Nursing                  | early | 0-121 days postpartum        |
|                          | mid   | 122-242 days postpartum      |
|                          | late  | 243-365 days postpartum      |
| Cycling (Post-weaning)   | --    | 0-60 days post weaning       |

447

448 The reproductive state of each of the 33 adult female capuchins is presented in Figure 6.

449 Throughout the 2014-2018 study period, 43 infants were born in the study population.

450 Behavioral data collection periods (2016-2018) included portions of or the full duration of 40 of  
 451 these pregnancies. Of these 40 infants, 26 infants survived to weaning (365 days), and behavioral  
 452 data collection included portions of all 40 nursing periods and captured transitions from nursing  
 453 to non-nursing states.

454

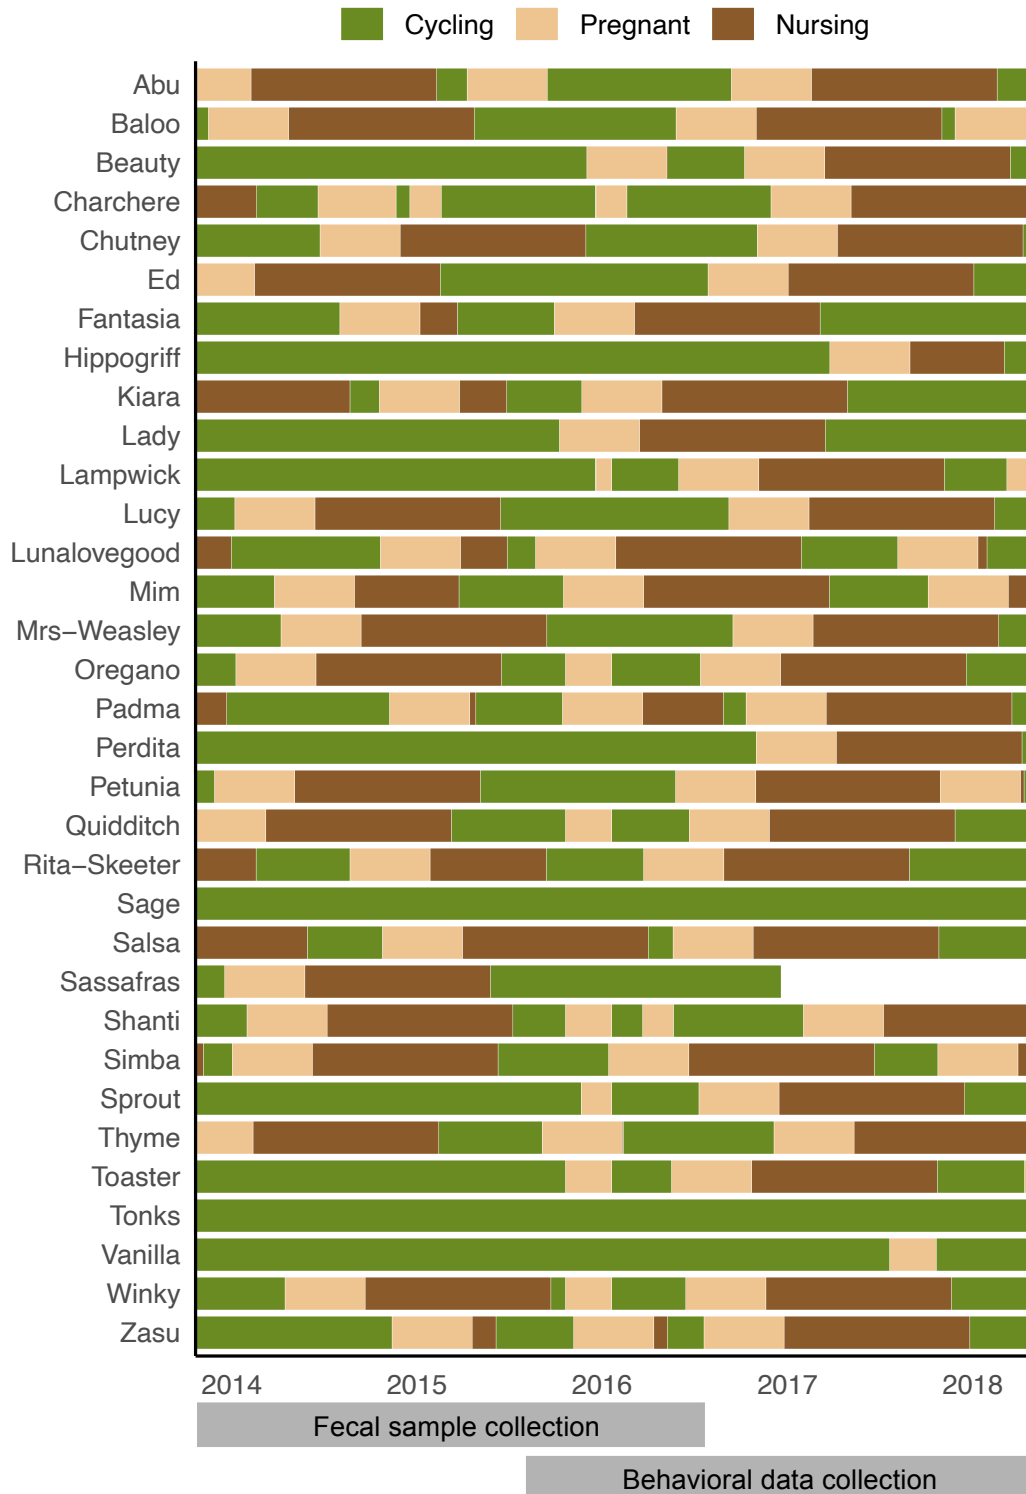

455

456 **Figure 6.** Reproductive status of study individuals observed between April 1, 2014 and June 30,

457 2018. Fecal samples were collected between April 29, 2014 and September 27, 2016. Behavioral

458 data were collected between April 20, 2016 and June 22, 2018. One individual (Sassafras)  
459 disappeared from the population in early 2017. Two individuals (Tonks and Vanilla) reached  
460 reproductive maturity during the study, but were never observed to be pregnant. Multiple  
461 females were observed to be pregnant via protrusion of the abdomen, but were subsequently  
462 observed with no protrusion. In these cases the tan (pregnancy) segments are followed by green  
463 (cycling) and not by brown (nursing) segments. Nursing segments that are shorter than 12  
464 months represent cases where infants died.

465

#### 466 *Daily individual activity budgets*

467

468 To determine daily activity budgets, we followed each of the 4 social groups from dawn (05:30)  
469 until dusk (18:00) for 4-6 days per month. Individual scans were recorded every 30 minutes on  
470 the hour and half hour. During a 10-minute period, we recorded the behavioral state of each  
471 individual in the group using an established ethogram (Supplemental Table 1). We chose to use  
472 scan sampling instead of focal sampling to determine individual activity budgets because it  
473 allows for more evenly distributed data across all individuals, season, and time of day (De  
474 Ruiter, 1986; Melin et al., 2018). Inter-observer reliability was tested daily for the first 4 weeks  
475 of each sampling period, then weekly or biweekly for the remainder of each period. We collected  
476 13721 individual scans over the course of 222 contact days.

477

#### 478 *Behavioral models for activity budget analysis*

479

480 We fit two generalized linear mixed models (GLMMs) that included reproductive stage as our  
481 predictor of interest. For our Resting Model, number of resting scans per day was our response  
482 variable, while for our Foraging Model, number of foraging scans per day was our response  
483 variable. In each model, we included monkey dominance category, daily maximum temperature  
484 (°C), daily rainfall (cm), and mean monthly estimated fruit biomass (kg/ha) as predictor variables  
485 as they may influence activity in this population. Ecological variables (e.g. maximum  
486 temperature, rainfall, and fruit biomass) were z-transformed (i.e. scaled so that each had a mean  
487 of 0 and standard deviation of 1) to stabilize the models. We included individual animal identity  
488 as a random effect in all models. Sampling effort (i.e. number of scans per animal per rotation)

489 varied due to changing field conditions and stochastic movement and dispersal of group  
490 members. We included a log-transformed offset of total scans per animal per day to account for  
491 differences in sampling effort. Because our behavioral data are count data and because  
492 behavioral scans occur independently, a Poisson distribution with a logit link was designated in  
493 all models.

494  
495 We tested whether our alternative models (fixed and random effects) outperformed the null  
496 models (random effects only). Likelihood ratio tests were conducted using the R function  
497 ANOVA. To test for multicollinearity between ecological variables a generalized linear model  
498 (GLM) was created to determine the variance inflation factor (VIF) (Craney & Surles, 2002).  
499 These models were identical to the alternative models above but contained only fixed effects.  
500 The resulting VIF measures collinearity in fixed effects. Craney and Surles (2002) suggest that  
501 appropriate cutoffs for VIF range from 5-10. All ecological variables had VIF indices below 2.0  
502 and were kept in all models (Supplemental Table 4).

503  
504 We computed incidence rate ratios using the outputs of our GLMMs to examine the effects of  
505 each predictor variable. For categorical variables, the incidence rate ratios represent the ratio of  
506 the number of scans recorded in one level compared to the number of scans recorded in another  
507 level. For variables with multiple levels (e.g. reproductive stage, dominance), a reference level is  
508 selected and other levels are compared to the reference level to contextualise the effects of each  
509 level on the response variable—in our case, resting scans or foraging scans. We plotted the  
510 predicted outcomes for each reproductive stage using the `plot_model` function in the R package  
511 `sjPlot` (Lüdtke, 2021). Visualising our data this way allowed us to identify patterns of resting  
512 behavior or foraging behavior associated with reproductive stage while holding constant the  
513 effect of all other predictors in our models.

514  
515 *Fecal sampling for gut microbiota analysis*

516  
517 We collected fresh fecal samples from study individuals 1-2 times per month within each  
518 sampling period in 2014-2016. Once an animal defecated, we immediately collected the feces  
519 into a sterile 2mL cryovial using personal protective equipment to minimize human

520 contamination of the samples. Fecal samples were visually inspected for dietary components,  
521 many of which are identifiable by seed shape or arthropod exoskeletons remnants in the feces.  
522 Dietary components were recorded to the most specific taxonomic classification possible.  
523 Samples were stored on ice in insulated field packs for a maximum of 5 hours before being  
524 transferred to a liquid nitrogen shipper (-90 C) for the remainder of the field season. If a sample  
525 was suspected to be contaminated or compromised (e.g. falling on an area where a previous  
526 defecation occurred), it was not collected. At the conclusion of each sampling season, samples  
527 were shipped to the University of Calgary for processing. Samples were collected with  
528 permission from the government of Costa Rica from CONAGEBIO (Approval No. R-025-2014-  
529 OT-CONEGABIO) and exported under the Área de Conservación Guanacaste permit (DSVS-  
530 029-2014-ACG-PI-060-2014). Samples were imported into Canada with permission from the  
531 Canadian Food Inspection Agency (Import Permit: A-2016-03992-4). All data collection  
532 complied with Costa Rican law and were approved by University of Calgary Animal Care  
533 Committee (#AC15-0161).

534

### 535 *Laboratory processing*

536

537 Prior to DNA extractions, all laboratory equipment was bleached, autoclaved, and exposed to 60  
538 minutes under UV light to minimize laboratory contamination. We randomized the order in  
539 which samples were extracted to decrease bias associated with batch effects. Prior to DNA  
540 extraction, we split each sample into two tubes, Extraction A and Extraction B to decrease  
541 potential bias based on stochastic distribution of microbes within a fecal. During each round of  
542 extractions, we extracted a laboratory blank to control for contamination from laboratory  
543 surfaces or reagent. The extraction protocol included a bead-beating step to increase DNA yield  
544 and specific optimizations are described in Orkin et al. (2019). We purified extracted DNA using  
545 an Invitrogen PureLink PCR Purification kit (ThermoFisher Scientific Part No. K310001), after  
546 which we combined extractions A and B prior to library preparation. Illumina amplicon  
547 sequencing libraries were prepared in for the V4 region of the 16S rRNA gene at the University  
548 of Minnesota following Gohl et al. (2016). Libraries were sequenced twice at the University of  
549 Calgary to increase reads per sample on an Illumina MiSeq using v2 chemistry.

550

551 *Amplicon data preparation*

552

553 Raw reads were demultiplexed and sequencing barcodes and indices were removed using  
554 cutadapt (Martin, 2011). We removed ambiguous base calls using the filterAndTrim function in  
555 the R package DADA2, removed locus-specific primers using cutadapt, then determined quality  
556 profiles using the plotQualityProfile (Callahan et al., 2016). Poor quality bases were truncated  
557 again using the filterAndTrim function. Error rates were learned and dereplication was done  
558 using learnErrors and derepFASTQ functions respectively. We merged forward and reverse  
559 reads to generate amplicon sequence variants (ASVs). Chimeras were removed using the  
560 removeBimeraDenovo function in DADA2, and we assigned taxonomies to ASVs using the  
561 silva\_nr\_v132\_train\_set.fa file. We extracted and sequenced a series of negative lab controls,  
562 which were then used to detect potential contaminants in the program decontam (Davis et al.,  
563 2018). Using the function isContaminant, we compared the prevalence of sequences from the  
564 negative controls with sequences from our samples. Using a 50% probability threshold, we  
565 identified probable contaminants and removed them from our fecal sample sequences. We then  
566 removed uncharacterized phyla, chloroplasts, and mitochondrial sequences from the dataset.

567

568 *Gut microbiota community structure*

569

570 To explore shifts in gut microbial community structure throughout the reproductive cycle, we  
571 computed Chao species richness and Shannon alpha diversity for each sample. We removed 4  
572 samples with Chao1 richness values >400 that were distinctly different than the remaining 304  
573 samples, with Chao1 values ranging from 12-385. Because we sampled individuals multiple  
574 times, and because sampling effort across individuals was uneven, we fit linear mixed effects  
575 models to examine the relationship between reproductive state and richness and diversity  
576 metrics. We included individual identity as a random effect in both models and included rainfall  
577 and maximum temperature as ecological predictors. We used an alpha of 0.05 as a significance  
578 cut-off.

579

580 We then removed extremely low-prevalence phyla for the remainder of analysis and filtered out  
581 taxa that were not present in at least 5% of samples. Due to sample size constraints, we were not

582 able to divide fecal samples into subsets within reproductive states and therefore proceeded with  
583 the categories cycling, pregnant, and nursing. To explore the relationship between reproductive  
584 state and gut microbial community dissimilarity within our sample set, we transformed sample  
585 counts to relative abundances and then computed Bray-Curtis dissimilarity values using the  
586 ordinate function in phyloseq. We visualized beta diversity using non-metric multidimensional  
587 scaling (NMDS). We used the function `adonis` in the R package `vegan` to run a PERMANOVA  
588 to examine predictors of Bray-Curtis dissimilarities in our dataset (Dixon, 2003). In this  
589 PERMANOVA, we included reproductive status as our predictor of interest, as well as  
590 individual identity, rainfall, and dietary category based on fecal contents, as we suspected these  
591 could be related to microbial community dissimilarity.

592

### 593 *Differential abundance*

594

595 To examine which, if any, bacterial taxa were differentially abundant among reproductive states,  
596 we agglomerated samples at the genus level, then used the R package `DESeq2` to compute  
597 variance stabilized counts (Love et al., 2014). We then used Wald tests to determine the log<sub>2</sub>  
598 fold differences among the reproductive states and used adjusted *P* values ( $\alpha = 0.01$ ) to  
599 account for multiple tests. We conducted pairwise comparisons between cycling and pregnant  
600 females, pregnant and nursing females, and nursing and cycling females to examine how these  
601 transitions might be related to gut microbial community structure. We repeated this analysis for  
602 all bacterial phyla in our dataset to examine coarse scale shifts in fecal microbial community  
603 structure among reproductive states.

604

### 605 *Estimated metabolic pathways*

606

607 We used the package `PICRUSt2` to estimate metabolic pathways present in our samples using  
608 KEGG orthologs (Douglas et al., 2020). We tested for significant dissimilarity in estimated  
609 metabolic pathways among the reproductive states using a PERMANOVA including individual  
610 identity as a control. We then used the linear discriminant analysis (LDA) effect size method  
611 using the `LEfSe` package (Segata et al., 2011), which identifies the functional metabolic  
612 pathways likely to explain differences between reproductive states and stages in our data. We



613 used a logarithmic LDA score of 2 as a cut off for discriminant features, and individual identity  
614 was included as a predictor to account for individual variation. All code used for analysis in this  
615 study is available at  
616 <https://github.com/webbshasta/CapuchinReproductionBehaviourMicrobiome>.

617

## 618 **ACKNOWLEDGEMENTS**

619 We thank: Roger Blanco and the Área de Conservación Guanacaste for permitting this research;  
620 Saul Cheves Hernandez, Monica Myers, Kelly Kries, Nuria Ferrero, Nile Carrethers, and Ronald  
621 Lopez for assistance in the field; and Urs Kalbitzer and Jeremy Hogan for help with analyses.  
622 The project that gave rise to these results received the support of a fellowship from “la Caixa”  
623 Foundation (ID 100010434) and from the European Union’s Horizon 2020 research and  
624 innovation programme under the Marie Skłodowska-Curie grant agreement No 847648 (JDO).  
625 The fellowship code is LCF/BQ/PI20/11760004. Research was also supported by The Eppley  
626 Foundation for Research (JDO, ADM), The International Center for Advanced Renewable  
627 Energy and Sustainability (I-CARES) (JDO, ADM), Washington University in St. Louis (JDO,  
628 ADM), the Alberta Children’s Hospital Research Institute (ACHRI) (ADM, SEW, JDO), the  
629 National Sciences and Engineering Research Council (ADM), a Canada Research Chair Tier II  
630 (ADM), Sigma Xi The Scientific Honor Research Society (SEW), the American Society of  
631 Primatologists (SEW), Alberta Innovates Technology Futures (SEW), and a Vanier Canada  
632 Graduate Scholarship (SEW).

## 633 **COMPETING INTERESTS**

634 The authors declare no competing interests.

## 635 **REFERENCES**

636

637 Altmann, J. (2001). *Baboon Mothers and Infants*. University of Chicago Press.

638 Amato, K. R., Leigh, S. R., Kent, A., Mackie, R. I., Yeoman, C. J., Stumpf, R. M., Wilson, B.

639 A., Nelson, K. E., White, B. A., & Garber, P. A. (2014). The role of gut microbes in

- 640 satisfying the nutritional demands of adult and juvenile wild, black howler monkeys  
641 (*Alouatta pigra*). *American Journal of Physical Anthropology*, 155(4), 652–664.
- 642 Báez-Saldaña, A., Camacho-Arroyo, I., Espinosa-Aguirre, J. J., Neri-Gómez, T., Rojas-Ochoa,  
643 A., Guerra-Araiza, C., Larrieta, E., Vital, P., Díaz, G., Chavira, R., & Fernandez-Mejia,  
644 C. (2009). Biotin deficiency and biotin excess: Effects on the female reproductive  
645 system. *Steroids*, 74(10), 863–869. <https://doi.org/10.1016/j.steroids.2009.06.004>
- 646 Bergstrom, M. L. (2015). *Seasonal Effects on the Nutrition and Energetic Condition of Female*  
647 *White-Faced Capuchin Monkeys* [Doctoral dissertation]. University of Calgary.
- 648 Bowen, W. D., Ellis, S. L., Iverson, S. J., & Boness, D. J. (2001). Maternal effects on offspring  
649 growth rate and weaning mass in harbour seals. *Canadian Journal of Zoology*, 79(6),  
650 1088–1101.
- 651 Callahan, B. J., McMurdie, P. J., Rosen, M. J., Han, A. W., Johnson, A. J. A., & Holmes, S. P.  
652 (2016). DADA2: High-resolution sample inference from Illumina amplicon data. *Nature*  
653 *Methods*, 13(7), 581–583. <https://doi.org/10.1038/nmeth.3869>
- 654 Campos, F. A., Bergstrom, M. L., Childers, A., Hogan, J. D., Jack, K. M., Melin, A. D.,  
655 Mosdossy, K. N., Myers, M. S., Parr, N. A., Sargeant, E., Schoof, V. A. M., & Fedigan,  
656 L. M. (2014). Drivers of home range characteristics across spatiotemporal scales in a  
657 Neotropical primate, *Cebus capucinus*. *Animal Behaviour*, 91, 93–109.  
658 <https://doi.org/10.1016/j.anbehav.2014.03.007>
- 659 Campos, F. A., & Fedigan, L. M. (2009). Behavioral adaptations to heat stress and water scarcity  
660 in white-faced capuchins (*Cebus capucinus*) in Santa Rosa National Park, Costa Rica.  
661 *American Journal of Physical Anthropology*, 138(1), 101–111.

- 662 Campos, F. A., Jack, K. M., & Fedigan, L. M. (2015). Climate oscillations and conservation  
663 measures regulate white-faced capuchin population growth and demography in a  
664 regenerating tropical dry forest in Costa Rica. *Biological Conservation*, *186*, 204–213.
- 665 Carnegie, S., Fedigan, L., & Melin, A. (2011). Reproductive Seasonality in Female Capuchins  
666 (*Cebus capucinus*) in Santa Rosa (Area de Conservación Guanacaste), Costa Rica.  
667 *International Journal of Primatology*, *32*(5), 1076–1090. afh.  
668 <https://doi.org/10.1007/s10764-011-9523-x>
- 669 Clutton-Brock, T. H., Albon, S. D., & Guinness, F. E. (1989). Fitness costs of gestation and  
670 lactation in wild mammals. *Nature*, *337*(6204), 260–262.  
671 <https://doi.org/10.1038/337260a0>
- 672 Craney, T. A., & Surles, J. G. (2002). Model-Dependent Variance Inflation Factor Cutoff  
673 Values. *Quality Engineering*, *14*(3), 391–403. <https://doi.org/10.1081/QEN-120001878>
- 674 Davis, N. M., Proctor, D. M., Holmes, S. P., Relman, D. A., & Callahan, B. J. (2018). Simple  
675 statistical identification and removal of contaminant sequences in marker-gene and  
676 metagenomics data. *Microbiome*, *6*(1), 226. <https://doi.org/10.1186/s40168-018-0605-2>
- 677 De Ruiter, J. R. (1986). The influence of group size on predator scanning and foraging behaviour  
678 of wedge-capped capuchin monkeys (*Cebus olivaceus*). *Behaviour*, *98*(1), 240–258.
- 679 Deschner, T., Kratzsch, J., & Hohmann, G. (2008). Urinary C-peptide as a method for  
680 monitoring body mass changes in captive bonobos (*Pan paniscus*). *Hormones and*  
681 *Behavior*, *54*(5), 620–626. <https://doi.org/10.1016/j.yhbeh.2008.06.005>
- 682 Dewey, K. G. (1997). Energy and Protein Requirements During Lactation. *Annual Review of*  
683 *Nutrition*, *17*(1), 19–36. <https://doi.org/10.1146/annurev.nutr.17.1.19>

- 684 DiGiulio, D. B., Callahan, B. J., McMurdie, P. J., Costello, E. K., Lyell, D. J., Robaczewska, A.,  
685 Sun, C. L., Goltsman, D. S. A., Wong, R. J., Shaw, G., Stevenson, D. K., Holmes, S. P.,  
686 & Relman, D. A. (2015). Temporal and spatial variation of the human microbiota during  
687 pregnancy. *Proceedings of the National Academy of Sciences*, *112*(35), 11060–11065.  
688 <https://doi.org/10.1073/pnas.1502875112>
- 689 Dixon, P. (2003). VEGAN, a package of R functions for community ecology. *Journal of*  
690 *Vegetation Science*, *14*(6), 927–930. <https://doi.org/10.1111/j.1654-1103.2003.tb02228.x>
- 691 Douglas, G. M., Maffei, V. J., Zaneveld, J. R., Yurgel, S. N., Brown, J. R., Taylor, C. M.,  
692 Huttenhower, C., & Langille, M. G. I. (2020). PICRUSt2 for prediction of metagenome  
693 functions. *Nature Biotechnology*, *38*(6), 685–688. [https://doi.org/10.1038/s41587-020-](https://doi.org/10.1038/s41587-020-0548-6)  
694 [0548-6](https://doi.org/10.1038/s41587-020-0548-6)
- 695 Dufour, D. I., & Sauther, M. I. (2002). Comparative and evolutionary dimensions of the  
696 energetics of human pregnancy and lactation. *American Journal of Human Biology*,  
697 *14*(5), 584–602. <https://doi.org/10.1002/ajhb.10071>
- 698 Edwards, S. M., Cunningham, S. A., Dunlop, A. L., & Corwin, E. J. (2017). The Maternal Gut  
699 Microbiome during Pregnancy. *MCN. The American Journal of Maternal Child Nursing*,  
700 *42*(6), 310–317. <https://doi.org/10.1097/NMC.0000000000000372>
- 701 Ellison, P. T. (2003). Energetics and reproductive effort. *American Journal of Human Biology*,  
702 *15*(3), 342–351. <https://doi.org/10.1002/ajhb.10152>
- 703 Emery Thompson, M. (2013). Comparative reproductive energetics of human and nonhuman  
704 primates. *Annual Review of Anthropology*, *42*, 287–304.

- 705 Fontaine, E. (2012). Food Intake and Nutrition During Pregnancy, Lactation and Weaning in the  
706 Dam and Offspring. *Reproduction in Domestic Animals*, 47(s6), 326–330.  
707 <https://doi.org/10.1111/rda.12102>
- 708 Fragaszy, D. M., Visalberghi, E., & Fedigan, L. M. (2004). *The Complete Capuchin: The*  
709 *Biology of the Genus Cebus*. Cambridge University Press.
- 710 Gittleman, J. L., & Thompson, S. D. (1988). Energy Allocation in Mammalian Reproduction.  
711 *Integrative and Comparative Biology*, 28(3), 863–875.  
712 <https://doi.org/10.1093/icb/28.3.863>
- 713 Gohl, D. M., Vangay, P., Garbe, J., MacLean, A., Hauge, A., Becker, A., Gould, T. J., Clayton,  
714 J. B., Johnson, T. J., Hunter, R., Knights, D., & Beckman, K. B. (2016). Systematic  
715 improvement of amplicon marker gene methods for increased accuracy in microbiome  
716 studies. *Nature Biotechnology*, 34(9), 942–949. <https://doi.org/10.1038/nbt.3601>
- 717 Harrison, M. J. (1983). Age and sex differences in the diet and feeding strategies of the green  
718 monkey, *Cercopithecus sabaues*. *Animal Behaviour*, 31(4), 969–977.
- 719 Healey, G. R., Murphy, R., Brough, L., Butts, C. A., & Coad, J. (2017). Interindividual  
720 variability in gut microbiota and host response to dietary interventions. *Nutrition*  
721 *Reviews*, 75(12), 1059–1080. <https://doi.org/10.1093/nutrit/nux062>
- 722 Johnson, S. E., & Brown, K. A. (2018). The Specialist Capuchin? Using Ecological Niche  
723 Models to Compare Niche Breadth in Mesoamerican Primates. In U. Kalbitzer & K. M.  
724 Jack (Eds.), *Primate Life Histories, Sex Roles, and Adaptability: Essays in Honour of*  
725 *Linda M. Fedigan* (pp. 311–329). Springer International Publishing.  
726 [https://doi.org/10.1007/978-3-319-98285-4\\_15](https://doi.org/10.1007/978-3-319-98285-4_15)

- 727 Jost, T., Lacroix, C., Braegger, C., & Chassard, C. (2013). Stability of the Maternal Gut  
728 Microbiota During Late Pregnancy and Early Lactation. *Current Microbiology*, 68(4),  
729 419–427. <https://doi.org/10.1007/s00284-013-0491-6>
- 730 Key, C., & Ross, C. (1999). Sex differences in energy expenditure in non–human primates.  
731 *Proceedings of the Royal Society of London B: Biological Sciences*, 266(1437), 2479–  
732 2485. <https://doi.org/10.1098/rspb.1999.0949>
- 733 Koren, O., Goodrich, J. K., Cullender, T. C., Spor, A., Laitinen, K., Kling Bäckhed, H.,  
734 Gonzalez, A., Werner, J. J., Angenent, L. T., Knight, R., Bäckhed, F., Isolauri, E.,  
735 Salminen, S., & Ley, R. E. (2012). Host Remodeling of the Gut Microbiome and  
736 Metabolic Changes during Pregnancy. *Cell*, 150(3), 470–480.  
737 <https://doi.org/10.1016/j.cell.2012.07.008>
- 738 Love, M. I., Huber, W., & Anders, S. (2014). Moderated estimation of fold change and  
739 dispersion for RNA-seq data with DESeq2. *Genome Biology*, 15(12), 550.  
740 <https://doi.org/10.1186/s13059-014-0550-8>
- 741 Lunn, P. G., Austin, S., Prentice, A. M., & Whitehead, R. G. (1984). The effect of improved  
742 nutrition on plasma prolactin concentrations and postpartum infertility in lactating  
743 Gambian women. *The American Journal of Clinical Nutrition*, 39(2), 227–235.  
744 <https://doi.org/10.1093/ajcn/39.2.227>
- 745 Magne, F., Gotteland, M., Gauthier, L., Zazueta, A., Pessoa, S., Navarrete, P., & Balamurugan, R.  
746 (2020). The Firmicutes/Bacteroidetes Ratio: A Relevant Marker of Gut Dysbiosis in  
747 Obese Patients? *Nutrients*, 12(5), 1474. <https://doi.org/10.3390/nu12051474>

- 748 Mallott, E. K., & Amato, K. R. (2018). The microbial reproductive ecology of white-faced  
749 capuchins (*Cebus capucinus*). *American Journal of Primatology*, 80(8), e22896.  
750 <https://doi.org/10.1002/ajp.22896>
- 751 Mallott, E. K., Amato, K. R., Garber, P. A., & Malhi, R. S. (2018). Influence of fruit and  
752 invertebrate consumption on the gut microbiota of wild white-faced capuchins (*Cebus*  
753 *capucinus*). *American Journal of Physical Anthropology*, 165(3), 576–588.  
754 <https://doi.org/10.1002/ajpa.23395>
- 755 Mallott, E. K., Borries, C., Koenig, A., Amato, K. R., & Lu, A. (2020). Reproductive hormones  
756 mediate changes in the gut microbiome during pregnancy and lactation in Phayre’s leaf  
757 monkeys. *Scientific Reports*, 10(1), 9961. <https://doi.org/10.1038/s41598-020-66865-2>
- 758 Martin, M. (2011). Cutadapt removes adapter sequences from high-throughput sequencing reads.  
759 *EMBnet.Journal*, 17(1), 10–12. <https://doi.org/10.14806/ej.17.1.200>
- 760 McCabe, G. M., & Fedigan, L. M. (2007). Effects of Reproductive Status on Energy Intake,  
761 Ingestion Rates, and Dietary Composition of Female *Cebus capucinus* at Santa Rosa,  
762 Costa Rica. *International Journal of Primatology*, 28(4), 837–851. <https://doi.org/10.1007/s10764-007-9159-z>
- 763  
764 Melin, A. D., Hogan, J. D., Campos, F. A., Wikberg, E., King-Bailey, G., Webb, S., Kalbitzer,  
765 U., Asensio, N., Murillo-Chacon, E., Hernandez, S. C., Chavarria, A. G., Schaffner, C.  
766 M., Kawamura, S., Aureli, F., Fedigan, L., & Jack, K. M. (2020). Primate life history,  
767 social dynamics, ecology, and conservation: Contributions from long-term research in  
768 Área de Conservación Guanacaste, Costa Rica. *Biotropica*, 52(6), 1041–1064.  
769 <https://doi.org/10.1111/btp.12867>

- 770 Melin, A. D., Webb, S. E., Williamson, R. E., & Chiou, K. L. (2018). Data Collection in Field  
771 Primatology: A Renewed Look at Measuring Foraging Behaviour. In U. Kalbitzer & K.  
772 M. Jack (Eds.), *Primate Life Histories, Sex Roles, and Adaptability: Essays in Honour of*  
773 *Linda M. Fedigan* (pp. 161–192). Springer International Publishing.  
774 [https://doi.org/10.1007/978-3-319-98285-4\\_9](https://doi.org/10.1007/978-3-319-98285-4_9)
- 775 Mock, D. M., Quirk, J. G., & Mock, N. I. (2002). Marginal biotin deficiency during normal  
776 pregnancy. *The American Journal of Clinical Nutrition*, 75(2), 295–299.  
777 <https://doi.org/10.1093/ajcn/75.2.295>
- 778 Mosdossy, K. N., Melin, A. D., & Fedigan, L. M. (2015). Quantifying seasonal fallback on  
779 invertebrates, pith, and bromeliad leaves by white-faced capuchin monkeys (*Cebus*  
780 *capucinus*) in a tropical dry forest. *American Journal of Physical Anthropology*, 158(1),  
781 67–77.
- 782 National Research Council, C. on A. N. (2003). Protein. In *Read “Nutrient Requirements of*  
783 *Nonhuman Primates: Second Revised Edition” at NAP.edu* (2nd ed., pp. 75–81). National  
784 Academies Press. <https://doi.org/10.17226/9826>
- 785 Orkin, J. D., Campos, F. A., Myers, M. S., Hernandez, S. E. C., Guadamuz, A., & Melin, A. D.  
786 (2019). Seasonality of the gut microbiota of free-ranging white-faced capuchins in a  
787 tropical dry forest. *The ISME Journal*, 13(1), 183. [https://doi.org/10.1038/s41396-018-](https://doi.org/10.1038/s41396-018-0256-0)  
788 [0256-0](https://doi.org/10.1038/s41396-018-0256-0)
- 789 Orkin, J. D., Webb, S. E., & Melin, A. D. (2019). Small to modest impact of social group on the  
790 gut microbiome of wild Costa Rican capuchins in a seasonal forest. *American Journal of*  
791 *Primatology*, 81(11), e22985. <https://doi.org/10.1002/ajp.22985>



- 792 Perry, C. A., West, A. A., Gayle, A., Lucas, L. K., Yan, J., Jiang, X., Malysheva, O., & Caudill,  
793 M. A. (2014). Pregnancy and Lactation Alter Biomarkers of Biotin Metabolism in  
794 Women Consuming a Controlled Diet. *The Journal of Nutrition*, *144*(12), 1977–1984.  
795 <https://doi.org/10.3945/jn.114.194472>
- 796 Poppitt, S. D., Prentice, A. M., Goldberg, G. R., & Whitehead, R. G. (1994). Energy-sparing  
797 strategies to protect human fetal growth. *American Journal of Obstetrics and*  
798 *Gynecology*, *171*(1), 118–125.
- 799 Poppitt, S. D., Prentice, A. M., Jéquier, E., Schutz, Y., & Whitehead, R. G. (1993). Evidence of  
800 energy sparing in Gambian women during pregnancy: A longitudinal study using whole-  
801 body calorimetry. *The American Journal of Clinical Nutrition*, *57*(3), 353–364.
- 802 Sargeant, E. J., Wikberg, E. C., Kawamura, S., Jack, K. M., & Fedigan, L. M. (2016). Paternal  
803 kin recognition and infant care in white-faced capuchins (*Cebus capucinus*). *American*  
804 *Journal of Primatology*, *78*(6), 659–668. <https://doi.org/10.1002/ajp.22530>
- 805 Segata, N., Izard, J., Waldron, L., Gevers, D., Miropolsky, L., Garrett, W. S., & Huttenhower, C.  
806 (2011). Metagenomic biomarker discovery and explanation. *Genome Biology*, *12*(6),  
807 R60. <https://doi.org/10.1186/gb-2011-12-6-r60>
- 808 Serio-Silva, J. C., Hernández-Salazar, L. T., & Rico-Gray, V. (1999). Nutritional composition of  
809 the diet of *Alouatta palliata mexicana* females in different reproductive states. *Zoo*  
810 *Biology*, *18*(6), 507–513. [https://doi.org/10.1002/\(SICI\)1098-2361\(1999\)18:6<507::AID-](https://doi.org/10.1002/(SICI)1098-2361(1999)18:6<507::AID-ZOO5>3.0.CO;2-R)  
811 [ZOO5>3.0.CO;2-R](https://doi.org/10.1002/(SICI)1098-2361(1999)18:6<507::AID-ZOO5>3.0.CO;2-R)
- 812 Smid, M. C., Ricks, N. M., Panzer, A., McCoy, A. N., Azcarate-Peril, M. A., Keku, T. O., &  
813 Boggess, K. A. (2018). Maternal gut microbiome biodiversity in pregnancy. *American*  
814 *Journal of Perinatology*, *35*(1), 24–30. <https://doi.org/10.1055/s-0037-1604412>

- 815 Sun, B., Xu, X., Xia, Y., Cheng, Y., Mao, S., Xiang, X., Xia, D., Wang, X., & Li, J. (2021).  
816 Variation of Gut Microbiome in Free-Ranging Female Tibetan Macaques (*Macaca*  
817 *thibetana*) across Different Reproductive States. *Animals*, *11*(1), 39.  
818 <https://doi.org/10.3390/ani11010039>
- 819 Turnbaugh, P. J., Ley, R. E., Mahowald, M. A., Magrini, V., Mardis, E. R., & Gordon, J. I.  
820 (2006). An obesity-associated gut microbiome with increased capacity for energy harvest.  
821 *Nature*, *444*(7122), 1027–1131. <https://doi.org/10.1038/nature05414>
- 822 Vasey, N. (2005). Activity budgets and activity rhythms in red ruffed lemurs (*Varecia rubra*) on  
823 the Masoala Peninsula, Madagascar: Seasonality and reproductive energetics. *American*  
824 *Journal of Primatology*, *66*(1), 23–44. <https://doi.org/10.1002/ajp.20126>
- 825 Villar, J., Cogswell, M., Kestler, E., Castillo, P., Menendez, R., & Repke, J. T. (1992). Effect of  
826 fat and fat-free mass deposition during pregnancy on birth weight. *American Journal of*  
827 *Obstetrics and Gynecology*, *167*(5), 1344–1352. [https://doi.org/10.1016/S0002-](https://doi.org/10.1016/S0002-9378(11)91714-1)  
828 [9378\(11\)91714-1](https://doi.org/10.1016/S0002-9378(11)91714-1)
- 829 Zhu, A., Sunagawa, S., Mende, D. R., & Bork, P. (2015). Inter-individual differences in the gene  
830 content of human gut bacterial species. *Genome Biology*, *16*(1), 82.  
831 <https://doi.org/10.1186/s13059-015-0646-9>

832

**Supplemental Table 1.** Ethogram of behaviors for white-faced capuchin monkeys at Sector Santa Rosa, Costa Rica

| Type of Behavior   | Specific Behavior           | Code | Description                                                          |
|--------------------|-----------------------------|------|----------------------------------------------------------------------|
| Foraging           | Forage: Insect (Extractive) | EFI  | Tearing branches, ripping bark                                       |
|                    | Forage: Fruit (Extractive)  | EFF  | Pounding, scrubbing, or breaking open fruits                         |
|                    | Forage: Flower              | FFL  | Feeding on flowers                                                   |
|                    | Forage: Fruit               | FFR  | Feeding on fruit                                                     |
|                    | Forage: Insect              | FIN  | Feeding on insects                                                   |
|                    | Forage: Other               | FOT  | Bromeliad leaves, pith, vertebrates                                  |
|                    | Forage: Visually            | VFO  | Actively looking for food, including gleaning insects while moving   |
|                    | Forage: Out of sight        | FOS  | Monkey is foraging but mouth and/or forelimbs are not visible        |
| Resting            | Rest (Solitary)             | RES  | Lying alone, not moving                                              |
|                    | Rest (Social)               | SRE  | Not moving, lying down                                               |
| Travel             | Travel                      | TRA  | Travel; moving very rapidly, not pausing for foraging or socializing |
| Social Affiliation | Social (Active)             | SAC  | Monkeys are affiliative; allogrooming                                |
| Social Aggression  | Social (Aggressive)         | SAG  | Chasing, biting conspecifics                                         |
| Other              | Vigilant                    | VIG  | Scanning intently at a long range (not for food)                     |
|                    | Drink                       | DRI  | Drink                                                                |
|                    | Excretion                   | EXC  | Excretion of feces, urine, or vomit                                  |
|                    | Self-Directed               | SDI  | Auto groom                                                           |
|                    | Play                        | PLA  | Play: biting, chasing, hitting, bouncing, pushing, pulling, etc.     |
|                    | Other                       | OTH  | Inter-group encounter, mobbing predator, sexual behaviour            |

**Supplemental Table 2.** Generalized linear mixed models for resting and foraging behaviours. Model results and incidence rate ratios were computed for each prediction.

| Generalized Linear Mixed Model                                                                                                                       |                                                                                                                                                                                                   | Results                           |                  |                 |               |                  |                       |                     |                  |
|------------------------------------------------------------------------------------------------------------------------------------------------------|---------------------------------------------------------------------------------------------------------------------------------------------------------------------------------------------------|-----------------------------------|------------------|-----------------|---------------|------------------|-----------------------|---------------------|------------------|
| Prediction                                                                                                                                           |                                                                                                                                                                                                   | Predictor                         | Estimate         | Std. Error      | Z-Value       | P-Value          | Incidence Rate Ratios | Confidence Interval | P-Value          |
| Females in periods of high energy demand (i.e., pregnancy, nursing) will rest more than females in periods of lower energy demand (i.e., cycling).   | TotalRestingScans ~ DominanceCat + RepStateStage + Rainfall_cm + TempMax + MonthlyFruitBiomass + offset(log(TotalScans)) + (1   Animal), data = dfzGrouped, family = poisson(link = "log")        | (Intercept)                       | -1.2988          | 0.08671         | -14.98        | <2e-16           | 0.27                  | 0.23 – 0.32         | <0.001           |
|                                                                                                                                                      |                                                                                                                                                                                                   | DominanceCatmid                   | -0.04233         | 0.06849         | -0.618        | 0.5365           | 0.96                  | 0.84 – 1.10         | 0.537            |
|                                                                                                                                                      |                                                                                                                                                                                                   | <b>DominanceCathigh</b>           | <b>-0.13081</b>  | <b>0.06053</b>  | <b>-2.161</b> | <b>0.0307</b>    | <b>0.88</b>           | <b>0.78 – 0.99</b>  | <b>0.031</b>     |
|                                                                                                                                                      |                                                                                                                                                                                                   | RepStateStagePregnancyStage1      | -0.13774         | 0.10057         | -1.37         | 0.1708           | 0.87                  | 0.72 – 1.06         | 0.171            |
|                                                                                                                                                      |                                                                                                                                                                                                   | RepStateStagePregnancyStage2      | -0.04896         | 0.10391         | -0.471        | 0.6375           | 0.95                  | 0.78 – 1.17         | 0.638            |
|                                                                                                                                                      |                                                                                                                                                                                                   | RepStateStagePregnancyStage3      | 0.08571          | 0.09624         | 0.891         | 0.3732           | 1.09                  | 0.90 – 1.32         | 0.373            |
|                                                                                                                                                      |                                                                                                                                                                                                   | RepStateStageNursingStage1        | 0.11913          | 0.08252         | 1.444         | 0.1488           | 1.13                  | 0.96 – 1.32         | 0.149            |
|                                                                                                                                                      |                                                                                                                                                                                                   | RepStateStageNursingStage2        | -0.09301         | 0.10209         | -0.911        | 0.3623           | 0.91                  | 0.75 – 1.11         | 0.362            |
|                                                                                                                                                      |                                                                                                                                                                                                   | RepStateStageNursingStage3        | 0.0879           | 0.10163         | 0.865         | 0.3871           | 1.09                  | 0.89 – 1.33         | 0.387            |
|                                                                                                                                                      |                                                                                                                                                                                                   | RepStateStageCycling PostWeaning  | 0.11204          | 0.10777         | 1.04          | 0.2985           | 1.12                  | 0.91 – 1.38         | 0.299            |
|                                                                                                                                                      |                                                                                                                                                                                                   | Rainfall cm                       | -0.04054         | 0.02174         | -1.865        | 0.0622           | 0.96                  | 0.92 – 1.00         | 0.062            |
|                                                                                                                                                      |                                                                                                                                                                                                   | <b>TempMax</b>                    | <b>0.22587</b>   | <b>0.02182</b>  | <b>10.352</b> | <b>&lt;2e-16</b> | <b>1.25</b>           | <b>1.20 – 1.31</b>  | <b>&lt;0.001</b> |
|                                                                                                                                                      |                                                                                                                                                                                                   | MonthlyFruitBiomass               | -0.01562         | 0.02175         | -0.718        | 0.4726           | 0.98                  | 0.94 – 1.03         | 0.473            |
| Females in periods of high energy demand (i.e., pregnancy, nursing) will forage more than females in periods of lower energy demand (i.e., cycling). | TotalForagingScans ~ DominanceCat + RepStateStage + Rainfall_cm + TempMax + MonthlyFruitBiomass + offset(log(TotalScans)) + (1   Group/Animal), data = dfzGrouped, family = poisson(link = "log") | (Intercept)                       | -0.54966         | 0.060256        | -9.122        | <2e-16           | 0.58                  | 0.51 – 0.65         | <0.001           |
|                                                                                                                                                      |                                                                                                                                                                                                   | DominanceCatmid                   | 0.016859         | 0.042153        | 0.4           | 0.6892           | 1.02                  | 0.94 – 1.10         | 0.689            |
|                                                                                                                                                      |                                                                                                                                                                                                   | DominanceCathigh                  | -0.030515        | 0.031026        | -0.984        | 0.3253           | 0.97                  | 0.91 – 1.03         | 0.325            |
|                                                                                                                                                      |                                                                                                                                                                                                   | RepStateStagePregnancyStage1      | 0.053213         | 0.061225        | 0.869         | 0.3848           | 1.05                  | 0.94 – 1.19         | 0.385            |
|                                                                                                                                                      |                                                                                                                                                                                                   | RepStateStagePregnancyStage2      | -0.003497        | 0.068042        | -0.051        | 0.959            | 1                     | 0.87 – 1.14         | 0.959            |
|                                                                                                                                                      |                                                                                                                                                                                                   | RepStateStagePregnancyStage3      | -0.02176         | 0.062772        | -0.347        | 0.7289           | 0.98                  | 0.87 – 1.11         | 0.729            |
|                                                                                                                                                      |                                                                                                                                                                                                   | <b>RepStateStageNursingStage1</b> | <b>-0.132814</b> | <b>0.053359</b> | <b>-2.489</b> | <b>0.0128</b>    | <b>0.88</b>           | <b>0.79 – 0.97</b>  | <b>0.013</b>     |
|                                                                                                                                                      |                                                                                                                                                                                                   | RepStateStageNursingStage2        | -0.043159        | 0.061833        | -0.698        | 0.4852           | 0.96                  | 0.85 – 1.08         | 0.485            |
|                                                                                                                                                      |                                                                                                                                                                                                   | RepStateStageNursingStage3        | -0.123121        | 0.067554        | -1.823        | 0.0684           | 0.88                  | 0.77 – 1.01         | 0.068            |
|                                                                                                                                                      |                                                                                                                                                                                                   | RepStateStageCycling PostWeaning  | -0.100933        | 0.072291        | -1.396        | 0.1627           | 0.9                   | 0.78 – 1.04         | 0.163            |
|                                                                                                                                                      |                                                                                                                                                                                                   | <b>Rainfall cm</b>                | <b>0.026021</b>  | <b>0.013125</b> | <b>1.983</b>  | <b>0.0474</b>    | <b>1.03</b>           | <b>1.00 – 1.05</b>  | <b>0.047</b>     |
|                                                                                                                                                      |                                                                                                                                                                                                   | <b>TempMax</b>                    | <b>-0.139173</b> | <b>0.016169</b> | <b>-8.608</b> | <b>&lt;2e-16</b> | <b>0.87</b>           | <b>0.84 – 0.90</b>  | <b>&lt;0.001</b> |
|                                                                                                                                                      |                                                                                                                                                                                                   | <b>MonthlyFruitBiomass</b>        | <b>0.038289</b>  | <b>0.016033</b> | <b>2.388</b>  | <b>0.0169</b>    | <b>1.04</b>           | <b>1.01 – 1.07</b>  | <b>0.017</b>     |

**Supplemental Table 4.** Linear mixed model outputs for richness and alpha diversity among fecal samples across reproductive states and PERMANOVA for Bray-Curtis dissimilarity among fecal samples.

| Study Component                                     | Model Description                                                  | Model                                                                                                       | Results                      |                 |                 |                |                |                       |                     |              |
|-----------------------------------------------------|--------------------------------------------------------------------|-------------------------------------------------------------------------------------------------------------|------------------------------|-----------------|-----------------|----------------|----------------|-----------------------|---------------------|--------------|
| Chao1 richness among reproductive states            | Generalized linear mixed model with negative binomial distribution | chao1~ ReproductiveStatus + scale(Rainfall) + scale(TemperatureMax) + (1 INDIVIDUAL), data=metadataFilt)    | Predictor                    | Estimate        | Std. Error      | Z-Value        | P-Value        | Incidence Rate Ratios | Confidence Interval | P-Value      |
|                                                     |                                                                    |                                                                                                             | (Intercept)                  | 4.76545         | 0.05274         | 90.356         | <0.0001        | 117.38                | 105.86 – 130.17     | <0.001       |
|                                                     |                                                                    |                                                                                                             | Nursing                      | -0.04053        | 0.09002         | -0.45          | 0.65256        | 0.96                  | 0.80 – 1.15         | 0.653        |
|                                                     |                                                                    |                                                                                                             | Pregnant                     | -0.13895        | 0.09505         | -1.462         | 0.14377        | 0.87                  | 0.72 – 1.05         | 0.144        |
|                                                     |                                                                    |                                                                                                             | <b>scale(Rainfall)</b>       | <b>-0.11816</b> | <b>0.03632</b>  | <b>-3.253</b>  | <b>0.00114</b> | <b>0.89</b>           | <b>0.83 – 0.95</b>  | <b>0.001</b> |
| scale(TemperatureMax)                               | 0.01115                                                            | 0.03721                                                                                                     | 0.3                          | 0.76439         | 1.01            | 0.94 – 1.09    | 0.764          |                       |                     |              |
| Shannon alpha diversity among reproductive states   | Linear mixed model with Gaussian distribution                      | alphadiv~ ReproductiveStatus + scale(TemperatureMax) + scale(Rainfall) + (1 INDIVIDUAL), data=metadataFilt) | Predictor                    | Estimate        | Std. Error      | T-Value        | P-Value        | Incidence Rate Ratios | Confidence Interval | P-Value      |
|                                                     |                                                                    |                                                                                                             | (Intercept)                  | 2.64774         | 0.0438          | 60.445         | --             | --                    | 2.56 – 2.73         | <0.001       |
|                                                     |                                                                    |                                                                                                             | Nursing                      | 0.09473         | 0.07983         | 1.187          | --             | --                    | -0.06 – 0.25        | 0.235        |
|                                                     |                                                                    |                                                                                                             | Pregnant                     | 0.08834         | 0.08754         | 1.009          | --             | --                    | -0.08 – 0.26        | 0.313        |
|                                                     |                                                                    |                                                                                                             | <b>scale(TemperatureMax)</b> | <b>0.07061</b>  | <b>0.03513</b>  | <b>2.01</b>    | --             | --                    | <b>0.00 – 0.14</b>  | <b>0.044</b> |
| scale(Rainfall)                                     | -0.05154                                                           | 0.03443                                                                                                     | -1.497                       | --              | --              | -0.12 – 0.02   | 0.134          |                       |                     |              |
| Bray-Curtis dissimilarity among reproductive states | PERMANOVA using adonis function R package vegan                    | distance(psState_filt, method="bray") ~ ReproductiveStatus + INDIVIDUAL + scale(Rainfall)                   | Predictor                    | Df              | Sums of Squares | Mean Squares   | F-Value        | R <sup>2</sup>        | P-Value             | --           |
|                                                     |                                                                    |                                                                                                             | Reproductive Status          | 2               | 0.614           | 0.30706        | 1.239          | 0.00789               | 0.186               |              |
|                                                     |                                                                    |                                                                                                             | <b>Individual</b>            | <b>28</b>       | <b>8.618</b>    | <b>0.30779</b> | <b>1.242</b>   | <b>0.11071</b>        | <b>0.005</b>        | --           |
|                                                     |                                                                    |                                                                                                             | <b>scale(Rainfall)</b>       | <b>1</b>        | <b>0.711</b>    | <b>0.71059</b> | <b>2.8674</b>  | <b>0.00913</b>        | <b>0.003</b>        | --           |

**Supplemental Table 4.** Generalized linear models to test variance inflation factor for ecological variables.

|                                                                           | Generalized Linear Model                                                                                                                                              |                     | GVIF     | Df | GVIF <sup>1/(2*Df)</sup> |
|---------------------------------------------------------------------------|-----------------------------------------------------------------------------------------------------------------------------------------------------------------------|---------------------|----------|----|--------------------------|
| Variance inflation factor test for ecological variables in Resting Model  | glm(TotalRestingScans ~ DominanceCat + RepStateStage + Rainfall_cm + TempMax + MonthlyFruitBiomass + offset(log(TotalScans)), data = dfzGrouped, family = "poisson")  | DominanceCat        | 1.080238 | 2  | 1.019483                 |
|                                                                           |                                                                                                                                                                       | RepStateStage       | 1.41904  | 7  | 1.025314                 |
|                                                                           |                                                                                                                                                                       | Rainfall_cm         | 1.197425 | 1  | 1.094269                 |
|                                                                           |                                                                                                                                                                       | TempMax             | 1.280846 | 1  | 1.131745                 |
|                                                                           |                                                                                                                                                                       | MonthlyFruitBiomass | 1.198814 | 1  | 1.094904                 |
|                                                                           |                                                                                                                                                                       |                     |          |    |                          |
|                                                                           | Generalized Linear Model                                                                                                                                              |                     | GVIF     | Df | GVIF <sup>1/(2*Df)</sup> |
| Variance inflation factor test for ecological variables in Foraging Model | glm(TotalForagingScans ~ DominanceCat + RepStateStage + Rainfall_cm + TempMax + MonthlyFruitBiomass + offset(log(TotalScans)), data = dfzGrouped, family = "poisson") | DominanceCat        | 1.080238 | 2  | 1.019483                 |
|                                                                           |                                                                                                                                                                       | RepStateStage       | 1.41904  | 7  | 1.025314                 |
|                                                                           |                                                                                                                                                                       | Rainfall_cm         | 1.197425 | 1  | 1.094269                 |
|                                                                           |                                                                                                                                                                       | TempMax             | 1.280846 | 1  | 1.131745                 |
|                                                                           |                                                                                                                                                                       | MonthlyFruitBiomass | 1.198814 | 1  | 1.094904                 |
|                                                                           |                                                                                                                                                                       |                     |          |    |                          |
